# Supplementary material
Source: publisher figshare collection journal article supplement (https://tandf.figshare.com/articles/dataset/_/6984290)
Supplement: Supplementary file 1 [file 1]

|                          | Gene Title                                   | Gene Symbol             | Primary keratinocytes |            |                |
|--------------------------|----------------------------------------------|-------------------------|-----------------------|------------|----------------|
|                          |                                              |                         | Average WT            | Average KO | Ratio of KO/WT |
| ATRA downregulated genes | keratin 10                                   | Krt10                   | 458,57                | 635,6      | 1,39           |
|                          | keratin 1                                    | Krt1                    | 9,17                  | 13,35      | 1,46           |
|                          | <b>keratin 6b</b>                            | Krt6b                   | 2738,76               | 11414,19   | <b>4,17</b>    |
|                          | bullous pemphigoid antigen 1 dystonin        | Dst                     | 10421,08              | 13182,37   | 1,26           |
|                          | cadherin 5                                   | Cdh5                    | 4,27                  | 4,27       | -1             |
|                          | <b>corneodesmosin</b>                        | Cdsn                    | 228,34                | 2283,69    | <b>10</b>      |
|                          | <b>desmocollin 1a/ 1b</b>                    | Dsc1                    | 88,51                 | 633,63     | <b>7,16</b>    |
|                          | desmocollin 3a/3b                            | Dsc3                    | 20826,84              | 19652,14   | -1,06          |
|                          | <b>desmoglein 1</b>                          | Dsg1b                   | 327,37                | 1004,49    | <b>3,07</b>    |
|                          | desmoplakin                                  | Dsp                     | 29572,79              | 34418,8    | 1,16           |
|                          | envoplakin                                   | Evpl                    | 1336,43               | 869,25     | -1,54          |
|                          | integrin alpha 3                             | Itga3                   | 14019,54              | 15210,01   | 1,08           |
|                          | integrin alpha 6                             | Itga6                   | 33692,64              | 36469,88   | 1,08           |
|                          | integrin beta 1                              | Itgb1                   | 21628,08              | 22210,94   | 1,03           |
|                          | integrin beta4                               | Itgb4                   | 6374,33               | 8857,35    | 1,39           |
|                          | hyaluronate receptor                         | Cd44                    | 31035,22              | 37770,43   | 1,22           |
|                          | collagen 16 alpha 1 subunit                  | Col16a1                 | 223,97                | 197,84     | -1,13          |
|                          | <b>filaggrin</b>                             | Flg                     | 182,29                | 1217,65    | <b>6,68</b>    |
|                          | <b>loricrin</b>                              | Lor                     | 18,75                 | 836        | <b>44,6</b>    |
|                          | <b>transglutaminase 1</b>                    | Tgm1                    | 182,12                | 363,62     | <b>2</b>       |
|                          | hydroxymethylglutaryl-coenzyme A reductase   | Hmgcr                   | 1487,52               | 1187,16    | -1,25          |
|                          | <b>tyrosinase-related protein 1</b>          | Tyrp1                   | 160,55                | 455,29     | <b>2,84</b>    |
|                          | 90-kDa heat-shock protein beta               | Hsp90b1                 | 39739,03              | 36280,93   | -1,1           |
|                          | catalase                                     | Cat                     | 6501,78               | 7602,7     | 1,17           |
|                          | semaphorin IV                                | Sema3f                  | 901,68                | 612,93     | -1,47          |
|                          | fatty acid synthase                          | Fasn                    | 4248,12               | 3326,72    | -1,28          |
|                          | nucleoside diphosphate kinase b              | Nme2                    | 55218,42              | 55240,37   | 1              |
|                          | calmodulin                                   | Calm3                   | 1373,99               | 1227,71    | -1,12          |
|                          | tyrosinase-protein kinase receptor tyro3     | LOC100048488 /// Tyro3  | 352,37                | 302,11     | -1,17          |
|                          | insulin-like growth factor binding protein 2 | Igfbp2                  | 405,76                | 347,79     | -1,17          |
|                          | <b>small-proline-rich protein IA</b>         | Sprr1a                  | 16518,35              | 31044,42   | <b>1,88</b>    |
|                          | <b>small-proline-rich protein IB</b>         | Sprr1b                  | 18371,73              | 32118,29   | <b>1,75</b>    |
|                          | <b>small-proline-rich protein 3</b>          | Sprr3                   | 8,54                  | 92,18      | <b>10,79</b>   |
|                          | sulfotransferase type 2 isoform BI           | Sult2b1                 | 644,35                | 882,58     | <b>1,37</b>    |
|                          | kruppel-like factor 4                        | Klf4                    | 13274,24              | 13798,41   | <b>1,04</b>    |
|                          | <b>Jagged JAG1</b>                           | Jag1                    | 3273,31               | 5014,12    | <b>1,53</b>    |
|                          | <b>keratin 23</b>                            | Krt23                   | 83,87                 | 165,4      | <b>1,97</b>    |
|                          | KRTHA1 (keratin, hair, acidic, 1)            | Krt31                   | 5,05                  | 5,05       | 1              |
|                          | KRTHA4                                       | Krt34                   | 5,22                  | 5,22       | 1              |
|                          | KRTHA3A                                      | Krt33a                  | 4,54                  | 4,53       | -1             |
|                          | <b>cystatin a</b>                            | Csta                    | 770,45                | 3394,13    | <b>4,41</b>    |
|                          | insulin-like growth factor binding protein 3 | Igfbp3                  | 6969,3                | 1706,58    | -4,08          |
|                          | <b>kallikrein 8</b>                          | Klk8                    | 2078,77               | 3580,89    | <b>1,72</b>    |
|                          | <b>serpinb3a</b>                             | Serpinb3a               | 5,72                  | 20,07      | <b>3,51</b>    |
|                          | Serpinb3b /// Serpinb3c                      | Serpinb3b /// Serpinb3c | 6,87                  | 7,56       | 1,1            |
|                          | <b>wnt5a</b>                                 | Wnt5a                   | 33,49                 | 73,16      | <b>2,18</b>    |
|                          | <b>calgranulin A</b>                         | S100a8                  | 12,02                 | 42,53      | <b>3,54</b>    |
| ATRA upregulated genes   | keratin 18                                   | Krt18                   | 1484,46               | 988,39     | -1,5           |
|                          | <b>keratin 19</b>                            | Krt19                   | 10,81                 | 6,22       | <b>-1,74</b>   |
|                          | cellular retinoic acid-binding protein II    | Crabp2                  | 1154,51               | 2303,06    | 1,99           |
|                          | heparin-binding EGF-like growth factor       | Hbegf                   | 4944,61               | 5369,56    | 1,09           |
|                          | interleukin-1 alpha                          | Il1a                    | 991,04                | 1236,63    | 1,25           |
|                          | interleukin 1 receptor antagonist protein    | Igf1                    | 4,88                  | 4,89       | 1              |
|                          | <b>interleukin-1 receptor type II</b>        | Il1r2                   | 283,92                | 113,16     | <b>-2,51</b>   |
|                          | calgranulin B                                | S100a9                  | 823,02                | 3777,97    | 4,59           |
|                          | platelet-derived growth factor A subunit     | Pdgfa                   | 1339,19               | 1570,51    | 1,17           |
|                          | keratin 7                                    | Krt7                    | 5,35                  | 5          | -1,07          |
|                          | keratin 15                                   | Krt15                   | 4,02                  | 4,13       | 1,03           |
|                          | crebl2                                       | ---                     | 4,32                  | 4,36       | 1,01           |
|                          | <b>hebp1</b>                                 | Hebp1                   | 441,45                | 227,36     | <b>-1,94</b>   |
|                          | lgals1                                       | Lgals1                  | 1205,3                | 1698,1     | 1,41           |
|                          | anxa1                                        | Anxa1                   | 63886,67              | 63004,99   | -1,01          |
|                          | fabp5                                        | EG620603 /// Fabp5      | 22117,79              | 33231,76   | 1,5            |
|                          | keratin 16                                   | Krt16                   | 13997,18              | 27235,44   | 1,95           |
|                          | keratin 5                                    | Krt5                    | 50433,18              | 51545,82   | 1,02           |
