# Supplementary material
Source: publisher figshare collection journal article supplement (https://tandf.figshare.com/articles/dataset/_/6984290)
Supplement: Supplementary file 2 [file 1]

| ID           | Gene Symbol   | Gene Title                                                                    | Average WT | Average KO | Ratio of KO/WT |
|--------------|---------------|-------------------------------------------------------------------------------|------------|------------|----------------|
| 1453218_at   | Lce1c         | late cornified envelope 1C                                                    | 9,91       | 521,01     | 52,58          |
| 1448745_s_at | Lor           | loricrin                                                                      | 18,75      | 836        | 44,6           |
| 1420350_at   | Lce1a2        | late cornified envelope 1A2                                                   | 25,65      | 916,08     | 35,71          |
| 1428980_at   | Krpr          | keratinocyte expressed, proline-rich                                          | 14,7       | 486,02     | 33,06          |
| 1420741_x_at | Lce1i         | late cornified envelope 1I                                                    | 58,49      | 1871,41    | 31,99          |
| 1417023_a_at | Fabp4         | fatty acid binding protein 4, adipocyte                                       | 8,01       | 229,57     | 28,66          |
| 1420677_x_at | Lce1a1        | late cornified envelope 1A1                                                   | 103,09     | 2731,4     | 26,5           |
| 1420676_at   | Lce1a1        | late cornified envelope 1A1                                                   | 88,53      | 2338,54    | 26,42          |
| 1420431_at   | Rptn          | repetin                                                                       | 8,73       | 222,64     | 25,51          |
| 1419409_at   | Lce1b         | late cornified envelope 1B                                                    | 11,73      | 285,56     | 24,35          |
| 1420332_x_at | Lce1d         | late cornified envelope 1D                                                    | 136,64     | 3030,02    | 22,17          |
| 1420550_at   | Lce1f         | late cornified envelope 1F                                                    | 149,9      | 3282,88    | 21,9           |
| 1454632_at   | Tmem229b      | transmembrane protein 229B                                                    | 6,2        | 122,85     | 19,81          |
| 1456001_at   | Lce3a         | late cornified envelope 3A                                                    | 88,96      | 1761,5     | 19,8           |
| 1417808_at   | 2310050C09Rik | RIKEN cDNA 2310050C09 gene                                                    | 11,44      | 194,91     | 17,04          |
| 1453405_at   | Pla2g4d       | phospholipase A2, group IVD                                                   | 9,53       | 127,35     | 13,37          |
| 1454883_at   | Gsdmc2        | gasdermin C2                                                                  | 7,75       | 101,32     | 13,08          |
| 1457254_x_at | Tmem229b      | transmembrane protein 229B                                                    | 9,48       | 109,52     | 11,55          |
| 1451263_a_at | Fabp4         | fatty acid binding protein 4, adipocyte                                       | 10,72      | 112,63     | 10,51          |
| 1429987_at   | 9930013L23Rik | RIKEN cDNA 9930013L23 gene                                                    | 33,56      | 348,79     | 10,39          |
| 1435191_at   | Cdsn          | corneodesmosin                                                                | 228,34     | 2283,69    | 10             |
| 1425715_at   | Il1f8         | interleukin 1 family, member 8                                                | 50,14      | 445,59     | 8,89           |
| 1429641_x_at | Lce3b         | late cornified envelope 3B                                                    | 205,92     | 1789,12    | 8,69           |
| 1437811_x_at | ---           | ---                                                                           | 124,63     | 1061,84    | 8,52           |
| 1439183_at   | Acer1         | alkaline ceramidase 1                                                         | 39,61      | 329,06     | 8,31           |
| 1460337_at   | Sh3kbp1       | SH3-domain kinase binding protein 1                                           | 124,67     | 996,74     | 8              |
| 1416687_at   | Plod2         | procollagen lysine, 2-oxoglutarate 5-dioxygenase 2                            | 68,4       | 521,39     | 7,62           |
| 1431592_a_at | Sh3kbp1       | SH3-domain kinase binding protein 1                                           | 153,98     | 1141,99    | 7,42           |
| 1421460_at   | Dsc1          | desmocollin 1                                                                 | 88,51      | 633,63     | 7,16           |
| 1435363_at   | Plekhhg1      | pleckstrin homology domain containing, family G (with RhoGef domain) member 1 | 34,5       | 242,72     | 7,04           |
| 1427268_at   | Flg           | filaggrin                                                                     | 182,29     | 1217,65    | 6,68           |
| 1420183_at   | Lor           | loricrin                                                                      | 219,72     | 1458,32    | 6,64           |
| 1454264_at   | 2310046K23Rik | RIKEN cDNA 2310046K23 gene                                                    | 320,18     | 2083,28    | 6,51           |
| 1435207_at   | Dixdc1        | DIX domain containing 1                                                       | 67,6       | 433,48     | 6,41           |
| 1422324_a_at | Pthlh         | parathyroid hormone-like peptide                                              | 22,6       | 137,47     | 6,08           |
| 1442339_at   | Stfa2l1       | stefin A2 like 1                                                              | 95,36      | 572,52     | 6              |
| 1423494_at   | 2310042E22Rik | RIKEN cDNA 2310042E22 gene                                                    | 69,27      | 410,13     | 5,92           |
| 1436838_x_at | Cotl1         | coactosin-like 1 (Dictyostelium)                                              | 1340,61    | 7835,89    | 5,85           |
| 1456203_at   | 1110020A10Rik | RIKEN cDNA 1110020A10 gene                                                    | 224,47     | 1292,35    | 5,76           |
| 1423407_a_at | Fbln2         | fibulin 2                                                                     | 30,1       | 166,85     | 5,54           |
| 1456515_s_at | Tcf15         | transcription factor-like 5 (basic helix-loop-helix)                          | 45,67      | 250,21     | 5,48           |
| 1422222_at   | lvl           | involucrin                                                                    | 85,94      | 456,81     | 5,32           |
| 1430785_at   | Sdr9c7        | 4short chain dehydrogenase/reductase family 9C, member 7                      | 78,64      | 412,27     | 5,24           |
| 1456074_at   | Sdr9c7        | 4short chain dehydrogenase/reductase family 9C, member 7                      | 43,45      | 226,72     | 5,22           |
| 1422963_at   | Sprr2i        | small proline-rich protein 2I                                                 | 371,81     | 1892,56    | 5,09           |
| 1417695_a_at | Soat1         | sterol O-acyltransferase 1                                                    | 180,2      | 910,48     | 5,05           |
| 1422184_a_at | Ak1           | adenylate kinase 1                                                            | 66,53      | 333,41     | 5,01           |
| 1437842_at   | Plcxd1        | phosphatidylinositol-specific phospholipase C, X domain containing 1          | 52,06      | 259,89     | 4,99           |
| 1418110_a_at | Inpp5d        | inositol polyphosphate-5-phosphatase D                                        | 42,08      | 204,81     | 4,87           |
| 1432269_a_at | Sh3kbp1       | SH3-domain kinase binding protein 1                                           | 28,28      | 136,66     | 4,83           |
| 1436236_x_at | Cotl1         | coactosin-like 1 (Dictyostelium)                                              | 156,95     | 757,26     | 4,83           |
| 1416002_x_at | Cotl1         | coactosin-like 1 (Dictyostelium)                                              | 63,51      | 299,82     | 4,72           |
| 1417697_at   | Soat1         | sterol O-acyltransferase 1                                                    | 23,7       | 109,27     | 4,61           |
| 1416686_at   | Plod2         | procollagen lysine, 2-oxoglutarate 5-dioxygenase 2                            | 33,03      | 151,77     | 4,6            |
| 1448756_at   | S100a9        | S100 calcium binding protein A9 (calgranulin B)                               | 823,02     | 3777,97    | 4,59           |
| 1448397_at   | Gjb6          | gap junction protein, beta 6                                                  | 129,93     | 581,63     | 4,48           |
| 1435760_at   | Csta          | cystatin A                                                                    | 770,45     | 3394,13    | 4,41           |
| 1457777_at   | Gsdma         | gasdermin A                                                                   | 50,44      | 221,13     | 4,38           |
| 1419317_x_at | Lce3c         | late cornified envelope 3C                                                    | 1048,79    | 4489,93    | 4,28           |
| 1422588_at   | Krt6b         | keratin 6B                                                                    | 2738,76    | 11414,19   | 4,17           |
| 1450633_at   | Calm4         | calmodulin 4                                                                  | 2384,41    | 9875,39    | 4,14           |
| 1439878_at   | lvl           | involucrin                                                                    | 540,59     | 2232,73    | 4,13           |
| 1450936_a_at | Dnase1l2      | deoxyribonuclease 1-like 2                                                    | 75,34      | 305,9      | 4,06           |
| 1449959_x_at | Lce1h         | late cornified envelope 1H                                                    | 176,9      | 698,75     | 3,95           |
| 1438855_x_at | Tnfaip2       | tumor necrosis factor, alpha-induced protein 2                                | 299,81     | 1179,92    | 3,94           |
| 1449451_at   | Serpinh11     | serine (or cysteine) peptidase inhibitor, clade B (ovalbumin), member 11      | 29,65      | 112,35     | 3,79           |
| 1457025_at   | Sdr16c6       | short chain dehydrogenase/reductase family 16C, member 6                      | 154,68     | 586,25     | 3,79           |
| 1421851_at   | Mtap1b        | microtubule-associated protein 1B                                             | 28,81      | 108,16     | 3,75           |
| 1424549_at   | Degs2         | degenerative spermatocyte homolog 2 (Drosophila), lipid desaturase            | 137,78     | 509,53     | 3,7            |
| 1437216_at   | Ccdc88a       | coiled coil domain containing 88A                                             | 80,78      | 293,73     | 3,64           |
| 1416846_a_at | Pdzrn3        | PDZ domain containing RING finger 3                                           | 32,98      | 119,5      | 3,62           |
| 1457448_at   | Pnpla1        | patatin-like phospholipase domain containing 1                                | 47,12      | 169,27     | 3,59           |
| 1429540_at   | Cnfn          | cornifelin                                                                    | 1728,66    | 6172,19    | 3,57           |
| 1429862_at   | Pla2g4e       | phospholipase A2, group IVE                                                   | 162,98     | 577,43     | 3,54           |
| 1419394_s_at | S100a8        | S100 calcium binding protein A8 (calgranulin A)                               | 1918,71    | 6785,7     | 3,54           |
| 1418609_at   | Il1f6         | interleukin 1 family, member 6                                                | 39,16      | 135,4      | 3,46           |
| 1451751_at   | Ddit4l        | DNA-damage-inducible transcript 4-like                                        | 40,99      | 137,69     | 3,36           |
| 1449279_at   | Gpx2          | glutathione peroxidase 2                                                      | 172,63     | 571,26     | 3,31           |
| 1444139_at   | Ddit4l        | DNA-damage-inducible transcript 4-like                                        | 84,59      | 278,99     | 3,3            |
| 1456211_at   | Nlrp10        | NLR family, pyrin domain containing 10                                        | 134,18     | 442,38     | 3,3            |
| 1435281_at   | Cpt1c         | carnitine palmitoyltransferase 1c                                             | 83,86      | 274,8      | 3,28           |
| 1419099_x_at | Stom          | stomatin                                                                      | 210,93     | 685,82     | 3,25           |
| 1425801_x_at | Cotl1         | coactosin-like 1 (Dictyostelium)                                              | 120,62     | 390,39     | 3,24           |
| 1448982_at   | Klk6          | kallikrein related-peptidase 6                                                | 448,18     | 1436,16    | 3,2            |
| 1455812_x_at | Vasr          | vasorin                                                                       | 381,81     | 1219,98    | 3,2            |
| 1430724_at   | Ephx3         | epoxide hydrolase 3                                                           | 54,27      | 171,61     | 3,16           |

|              |                       |                                                                                  |         |          |      |
|--------------|-----------------------|----------------------------------------------------------------------------------|---------|----------|------|
| 1428705_at   | 1700007K13Rik         | RIKEN cDNA 1700007K13 gene                                                       | 52,2    | 164,4    | 3,15 |
| 1417696_at   | Soat1                 | sterol O-acyltransferase 1                                                       | 203,02  | 638,99   | 3,15 |
| 1447602_x_at | Sulf2                 | sulfatase 2                                                                      | 448,42  | 1413,73  | 3,15 |
| 1455180_at   | Gcom1                 | GRINL1A complex locus                                                            | 34,3    | 106,79   | 3,11 |
| 1417860_a_at | Spon2                 | spondin 2, extracellular matrix protein                                          | 147,83  | 455,02   | 3,08 |
| 1455519_at   | Dsg1b                 | desmoglein 1 beta                                                                | 327,37  | 1004,49  | 3,07 |
| 1420771_at   | Sprr2d                | small proline-rich protein 2D                                                    | 2615,32 | 8028,18  | 3,07 |
| 1448890_at   | Klf2                  | Kruppel-like factor 2 (lung)                                                     | 33,76   | 103,46   | 3,06 |
| 1419098_at   | Stom                  | stomatin                                                                         | 202,3   | 618,52   | 3,06 |
| 1456795_at   | Bend4                 | BEN domain containing 4                                                          | 36,84   | 110,33   | 2,99 |
| 1449341_a_at | Stom                  | stomatin                                                                         | 172,58  | 513,68   | 2,98 |
| 1415997_at   | Txnip                 | thioredoxin interacting protein                                                  | 76,04   | 222,27   | 2,92 |
| 1421156_a_at | Dsc2                  | desmocollin 2                                                                    | 796,53  | 2327,1   | 2,92 |
| 1437407_at   | Rnf222                | ring finger protein 222                                                          | 37,13   | 108,05   | 2,91 |
| 1449833_at   | Sprr2f                | small proline-rich protein 2F                                                    | 578,05  | 1682,38  | 2,91 |
| 1415862_at   | Tyrp1                 | tyrosinase-related protein 1                                                     | 126,07  | 364,04   | 2,89 |
| 1455792_x_at | Ndn                   | neccdin                                                                          | 76,33   | 218,74   | 2,87 |
| 1449682_s_at | Tubb2a-ps2 /// Tubb2b | tubulin, beta 2a, pseudogene 2 /// tubulin, beta 2B                              | 356,85  | 1022,43  | 2,87 |
| 1454015_a_at | Cdh13                 | cadherin 13                                                                      | 88,2    | 252,6    | 2,86 |
| 1423634_at   | Gsdma                 | gasdermin A                                                                      | 192,16  | 550,2    | 2,86 |
| 1417576_a_at | Otub2                 | OTU domain, ubiquitin aldehyde binding 2                                         | 73,39   | 209,47   | 2,85 |
| 1421370_a_at | Il1f5                 | interleukin 1 family, member 5 (delta)                                           | 587,99  | 1673,99  | 2,85 |
| 1415861_at   | Tyrp1                 | tyrosinase-related protein 1                                                     | 160,55  | 455,29   | 2,84 |
| 1430700_a_at | Pla2g7                | phospholipase A2, group VII (platelet-activating factor acetylhydrolase, plasma) | 83,54   | 235,69   | 2,82 |
| 1453092_at   | Crcr1                 | cysteine-rich C-terminal 1                                                       | 4886,91 | 13636,36 | 2,79 |
| 1450811_at   | Sprr2j-ps             | small proline-rich protein 2J, pseudogene                                        | 550,65  | 1535,98  | 2,79 |
| 1423071_x_at | LOC100505088          | hypothetical LOC100505088                                                        | 101,77  | 282,58   | 2,78 |
| 1416342_at   | Tnc                   | tenascin C                                                                       | 1112,14 | 3020,97  | 2,72 |
| 1419157_at   | Sox4                  | SRY-box containing gene 4                                                        | 140,01  | 380,84   | 2,72 |
| 1424195_a_at | Inpp5d                | inositol polyphosphate-5-phosphatase D                                           | 55,16   | 148,26   | 2,69 |
| 1449974_at   | Gapdhs                | glyceraldehyde-3-phosphate dehydrogenase, spermatogenic                          | 173,12  | 465,41   | 2,69 |
| 1438849_at   | Krt78                 | keratin 78                                                                       | 85,96   | 229,96   | 2,68 |
| 1456248_at   | Lce3f                 | late cornified envelope 3F                                                       | 765,19  | 2050,09  | 2,68 |
| 1455106_a_at | Ckb                   | creatine kinase, brain                                                           | 56,06   | 147,87   | 2,64 |
| 1448810_at   | Gne                   | glucosamine                                                                      | 83,2    | 219,63   | 2,64 |
| 1445818_at   | 4930544M13Rik         | RIKEN cDNA 4930544M13 gene                                                       | 43,2    | 113,37   | 2,62 |
| 1420537_at   | Kctd4                 | potassium channel tetramerisation domain containing 4                            | 157,4   | 412,08   | 2,62 |
| 1427894_at   | Vasn                  | vasorin                                                                          | 61,47   | 160,65   | 2,61 |
| 1416001_a_at | Cotl1                 | coactosin-like 1 (Dictyostelium)                                                 | 47,02   | 122,65   | 2,61 |
| 1418028_at   | Dct                   | dopachrome tautomerase                                                           | 87,25   | 224,42   | 2,57 |
| 1438118_x_at | Vim                   | vimentin                                                                         | 41,18   | 105,59   | 2,56 |
| 1434083_a_at | Elmod1                | ELMO domain containing 1                                                         | 42,45   | 108,47   | 2,56 |
| 1434959_at   | Dhh                   | desert hedgehog                                                                  | 66,37   | 168,8    | 2,54 |
| 1417218_at   | Calhm2                | calcium homeostasis modulator 2                                                  | 61,97   | 157,44   | 2,54 |
| 1430388_a_at | Sulf2                 | sulfatase 2                                                                      | 264,33  | 669,71   | 2,53 |
| 1418266_at   | Alox12b               | arachidonate 12-lipoxygenase, 12R type                                           | 73,72   | 185,47   | 2,52 |
| 1426481_at   | Klhl22                | kelch-like 22 (Drosophila)                                                       | 43,42   | 109,15   | 2,51 |
| 1457700_at   | Cyp4f39               | cytochrome P450, family 4, subfamily f, polypeptide 39                           | 117,81  | 293,53   | 2,49 |
| 1422344_s_at | Tnfrsf10b             | tumor necrosis factor receptor superfamily, member 10b                           | 44,58   | 110,76   | 2,48 |
| 1416926_at   | Trp53inp1             | transformation related protein 53 inducible nuclear protein 1                    | 1780,44 | 4390,77  | 2,47 |
| 1423274_at   | Ints6                 | integrator complex subunit 6                                                     | 286,68  | 705,41   | 2,46 |
| 1460463_at   | H60c                  | histocompatibility 60c                                                           | 252,44  | 616,46   | 2,44 |
| 1416666_at   | Serpine2              | serine (or cysteine) peptidase inhibitor, clade E, member 2                      | 53,23   | 129,13   | 2,43 |
| 1435761_at   | BC100530 /// Stfa1    | cDNA sequence BC100530 /// stefin A1                                             | 6634,27 | 16131,27 | 2,43 |
| 1435383_x_at | Ndn                   | neccdin                                                                          | 167,21  | 407,09   | 2,43 |
| 1449169_at   | Has2                  | hyaluronan synthase 2                                                            | 83,7    | 202,93   | 2,42 |
| 1448364_at   | Ccng2                 | cyclin G2                                                                        | 125,49  | 303,62   | 2,42 |
| 1444723_at   | 6530418L21Rik         | RIKEN cDNA 6530418L21 gene                                                       | 47,84   | 115,28   | 2,41 |
| 1418072_at   | Hist1h2bc             | histone cluster 1, H2bc                                                          | 927,16  | 2231,64  | 2,41 |
| 1456005_a_at | Bcl2l11               | BCL2-like 11 (apoptosis facilitator)                                             | 45,24   | 108,7    | 2,4  |
| 1435382_at   | Ndn                   | neccdin                                                                          | 171,5   | 409,68   | 2,39 |
| 1452679_at   | Tubb2b                | tubulin, beta 2B                                                                 | 1312,08 | 3131,18  | 2,39 |
| 1416488_at   | Ccng2                 | cyclin G2                                                                        | 440,8   | 1046,74  | 2,37 |
| 1424528_at   | Cgref1                | cell growth regulator with EF hand domain 1                                      | 63,58   | 150,26   | 2,36 |
| 1429676_at   | ---                   | ---                                                                              | 138,81  | 328,02   | 2,36 |
| 1438658_a_at | S1pr3                 | sphingosine-1-phosphate receptor 3                                               | 46,85   | 108,96   | 2,33 |
| 1426915_at   | Dapk1                 | death associated protein kinase 1                                                | 163,2   | 379,72   | 2,33 |
| 1423271_at   | Gjb2                  | gap junction protein, beta 2                                                     | 956,07  | 2226,46  | 2,33 |
| 1428111_at   | Slc38a4               | solute carrier family 38, member 4                                               | 56,07   | 130,23   | 2,32 |
| 1437111_at   | Zc3h12c               | zinc finger CCCH type containing 12C                                             | 93,96   | 217,94   | 2,32 |
| 1421605_a_at | Aqp9                  | aquaporin 9                                                                      | 126,46  | 290,49   | 2,3  |
| 1415996_at   | Txnip                 | thioredoxin interacting protein                                                  | 233,88  | 537,34   | 2,3  |
| 1417516_at   | Ddit3                 | DNA-damage inducible transcript 3                                                | 361,84  | 832,19   | 2,3  |
| 1419097_a_at | Stom                  | stomatin                                                                         | 594,46  | 1366,32  | 2,3  |
| 1420973_at   | Arid5b                | AT rich interactive domain 5B (MRF1-like)                                        | 49,83   | 114,24   | 2,29 |
| 1423294_at   | Mest                  | mesoderm specific transcript                                                     | 125,76  | 287,9    | 2,29 |
| 1437176_at   | Nlrc5                 | NLR family, CARD domain containing 5                                             | 86,9    | 198,18   | 2,28 |
| 1424938_at   | Steap1                | six transmembrane epithelial antigen of the prostate 1                           | 545,93  | 1235,63  | 2,26 |
| 1435572_at   | 2310014L17Rik         | RIKEN cDNA 2310014L17 gene                                                       | 165,36  | 373,37   | 2,26 |
| 1438910_a_at | Stom                  | stomatin                                                                         | 501,5   | 1134,74  | 2,26 |
| 1426911_at   | Dsc2                  | desmocollin 2                                                                    | 1254,4  | 2824,74  | 2,25 |
| 1431322_at   | Igfb3                 | immunoglobulin superfamily, member 3                                             | 239,88  | 537,76   | 2,24 |
| 1447852_x_at | Rilpl1                | Rab interacting lysosomal protein-like 1                                         | 126,7   | 283,42   | 2,24 |
| 1455140_at   | Pitpnm3               | PITPNM family member 3                                                           | 120,52  | 269,9    | 2,24 |
| 1439555_at   | Rlf                   | rearranged L-myc fusion sequence                                                 | 74,25   | 165,5    | 2,23 |
| 1422523_at   | Si                    | silver                                                                           | 53,13   | 118,57   | 2,23 |
| 1439409_x_at | Tyrp1                 | tyrosinase-related protein 1                                                     | 83,4    | 185,79   | 2,23 |

|              |               |                                                                                  |          |          |       |
|--------------|---------------|----------------------------------------------------------------------------------|----------|----------|-------|
| 1428025_s_at | Pitpnc1       | phosphatidylinositol transfer protein, cytoplasmic 1                             | 318,41   | 708,61   | 2,23  |
| 1420388_at   | Prss12        | protease, serine, 12 neurotrypsin (motopsin)                                     | 297,05   | 662,81   | 2,23  |
| 1439352_at   | Trim7         | tripartite motif-containing 7                                                    | 109,73   | 244,72   | 2,23  |
| 1428306_at   | Ddit4         | DNA-damage-inducible transcript 4                                                | 3160,84  | 7014,58  | 2,22  |
| 1424226_at   | 9030617O03Rik | RIKEN cDNA 9030617O03 gene                                                       | 143,54   | 318,15   | 2,22  |
| 1449938_at   | Endou         | endonuclease, polyU-specific                                                     | 3605,58  | 7990,47  | 2,22  |
| 1449367_at   | Trex2         | three prime repair exonuclease 2                                                 | 564,62   | 1246,09  | 2,21  |
| 1417689_a_at | Pdzk1ip1      | PDZK1 interacting protein 1                                                      | 57,91    | 126,61   | 2,19  |
| 1425139_at   | Sesn2         | sestrin 2                                                                        | 363,79   | 793,36   | 2,18  |
| 1433885_at   | Iqgap2        | IQ motif containing GTPase activating protein 2                                  | 157,4    | 341,27   | 2,17  |
| 1447903_x_at | Ap1s2         | adaptor-related protein complex 1, sigma 2 subunit                               | 48,18    | 103,98   | 2,16  |
| 1421134_at   | Areg          | amphiregulin                                                                     | 768,48   | 1657,53  | 2,16  |
| 1425296_a_at | Rgs3          | regulator of G-protein signaling 3                                               | 112,35   | 242,81   | 2,16  |
| 1454971_x_at | Tsc22d1       | TSC22 domain family, member 1                                                    | 5747,98  | 12386,08 | 2,15  |
| 1434115_at   | Cdh13         | cadherin 13                                                                      | 100,7    | 216,44   | 2,15  |
| 1449937_at   | Endou         | endonuclease, polyU-specific                                                     | 1665,82  | 3577     | 2,15  |
| 1421624_a_at | Enah          | enabled homolog (Drosophila)                                                     | 575,94   | 1238,46  | 2,15  |
| 1429230_at   | Klk5          | kallikrein related-peptidase 5                                                   | 102,04   | 218,3    | 2,14  |
| 1437232_at   | Bpil2         | bactericidal/permeability-increasing protein-like 2                              | 465,4    | 990,57   | 2,13  |
| 1416927_at   | Trp53inp1     | transformation related protein 53 inducible nuclear protein 1                    | 100,98   | 213,71   | 2,12  |
| 1456317_at   | Aldh3b2       | aldehyde dehydrogenase 3 family, member B2                                       | 64,2     | 135,21   | 2,11  |
| 1426858_at   | Inhbb         | inhibin beta-B                                                                   | 648,33   | 1368,52  | 2,11  |
| 1419721_at   | Niacr1        | niacin receptor 1                                                                | 58,52    | 123,02   | 2,1   |
| 1435394_s_at | Rhoc          | ras homolog gene family, member C                                                | 48,61    | 101,35   | 2,09  |
| 1450449_a_at | Rilpl1        | Rab interacting lysosomal protein-like 1                                         | 80,96    | 169,29   | 2,09  |
| 1420583_a_at | Rora          | RAR-related orphan receptor alpha                                                | 120,91   | 253,31   | 2,09  |
| 1425416_s_at | Psrc1         | proline/serine-rich coiled-coil 1                                                | 94,12    | 196,11   | 2,08  |
| 1417268_at   | Cd14          | CD14 antigen                                                                     | 72,68    | 151,06   | 2,08  |
| 1438402_at   | Fam171a1      | family with sequence similarity 171, member A1                                   | 53,97    | 112,49   | 2,08  |
| 1448239_at   | Hmox1         | heme oxygenase (decycling) 1                                                     | 746,3    | 1551,67  | 2,08  |
| 1427742_a_at | Klf6          | Kruppel-like factor 6                                                            | 1790,83  | 3720,52  | 2,08  |
| 1437722_x_at | Pcbp3         | Poly(rC) binding protein 3                                                       | 121,69   | 253,69   | 2,08  |
| 1418203_at   | Pmaip1        | phorbol-12-myristate-13-acetate-induced protein 1                                | 3564,72  | 7414,78  | 2,08  |
| 1424011_at   | Aqp9          | aquaporin 9                                                                      | 163,33   | 337,8    | 2,07  |
| 1418538_at   | Kdelr3        | KDEL (Lys-Asp-Glu-Leu) endoplasmic reticulum protein retention receptor 3        | 145,43   | 300,6    | 2,07  |
| 1451776_s_at | Hopx          | HOP homeobox                                                                     | 3122,08  | 6396,47  | 2,05  |
| 1418181_at   | Ptp4a3        | protein tyrosine phosphatase 4a3                                                 | 258,28   | 528,27   | 2,05  |
| 1433453_a_at | Abtb2         | ankyrin repeat and BTB (POZ) domain containing 2                                 | 1276,5   | 2599,12  | 2,04  |
| 1423542_at   | Klk7          | kallikrein related-peptidase 7 (chymotryptic, stratum corneum)                   | 2408,22  | 4922,56  | 2,04  |
| 1419709_at   | Stfa3         | stefin A3                                                                        | 1982,8   | 4051,39  | 2,04  |
| 1454758_a_at | Tsc22d1       | TSC22 domain family, member 1                                                    | 2721,86  | 5514,13  | 2,03  |
| 1417575_at   | Otub2         | OTU domain, ubiquitin aldehyde binding 2                                         | 233,79   | 475,67   | 2,03  |
| 1435945_a_at | Kcnm4         | potassium intermediate/small conductance calcium-activated channel, subfamily N, | 2192,95  | 4424,42  | 2,02  |
| 1454646_at   | Tcp11l2       | t-complex 11 (mouse) like 2                                                      | 126,28   | 255,13   | 2,02  |
| 1460501_at   | 4930521G14Rik | RIKEN cDNA 4930521G14 gene                                                       | 171,48   | 345,79   | 2,02  |
| 1448889_at   | Slc38a4       | solute carrier family 38, member 4                                               | 191,37   | 386,46   | 2,02  |
| 1424530_at   | Sec14l2       | SEC14-like 2 (S. cerevisiae)                                                     | 55,22    | 110,87   | 2,01  |
| 1426995_a_at | Gfer          | growth factor, erv1 (S. cerevisiae)-like (augmenter of liver regeneration)       | 636,08   | 1278,61  | 2,01  |
| 1451628_a_at | Ank3          | ankyrin 3, epithelial                                                            | 66,86    | 133,86   | 2     |
| 1424351_at   | Wfdc2         | WAP four-disulfide core domain 2                                                 | 774,21   | 1545,35  | 2     |
| 1451416_a_at | Tgm1          | transglutaminase 1, K polypeptide                                                | 182,12   | 363,62   | 2     |
| 1417415_at   | Slc6a3        | solute carrier family 6 (neurotransmitter transporter, dopamine), member 3       | 137,3    | 68,58    | -2    |
| 1434520_at   | Sc5d          | sterol-C5-desaturase (fungal ERG3, delta-5-desaturase) homolog (S. cerevisiae)   | 232,6    | 116,22   | -2    |
| 1425681_a_at | Prnd          | prion protein dublet                                                             | 293,05   | 145,61   | -2,01 |
| 1436186_at   | E2f8          | E2F transcription factor 8                                                       | 1601,83  | 798,73   | -2,01 |
| 1418694_at   | Kcmf1         | potassium channel modulatory factor 1                                            | 318,59   | 158,34   | -2,01 |
| 1440221_at   | AA408650      | expressed sequence AA408650                                                      | 132,45   | 65,59    | -2,02 |
| 1415824_at   | Scd2          | stearoyl-Coenzyme A desaturase 2                                                 | 1516,44  | 751,91   | -2,02 |
| 1449773_s_at | Gadd45b       | growth arrest and DNA-damage-inducible 45 beta                                   | 1443,92  | 714,84   | -2,02 |
| 1455732_at   | 1700025G04Rik | RIKEN cDNA 1700025G04 gene                                                       | 976,77   | 483,18   | -2,02 |
| 1450005_x_at | Dlk2          | delta-like 2 homolog (Drosophila)                                                | 893,88   | 441,67   | -2,02 |
| 1437181_at   | Peli2         | pellino 2                                                                        | 119,65   | 59,01    | -2,03 |
| 1426208_x_at | Plagl1        | pleiomorphic adenoma gene-like 1                                                 | 8214,46  | 4036,86  | -2,03 |
| 1423680_at   | Fads1         | fatty acid desaturase 1                                                          | 283,79   | 139,46   | -2,03 |
| 1429067_at   | Capns2        | calpain, small subunit 2                                                         | 2409,94  | 1181,11  | -2,04 |
| 1417654_at   | Sdc4          | syndecan 4                                                                       | 391,84   | 191,86   | -2,04 |
| 1441975_at   | Acpp          | acid phosphatase, prostate                                                       | 800,22   | 391,95   | -2,04 |
| 1436839_at   | 2010109K11Rik | RIKEN cDNA 2010109K11 gene                                                       | 1459,38  | 712,71   | -2,05 |
| 1421262_at   | Lipg          | lipase, endothelial                                                              | 1805,04  | 879,06   | -2,05 |
| 1418184_at   | Cenpm         | centromere protein M                                                             | 324,8    | 158,36   | -2,05 |
| 1420847_a_at | Fgfr2         | fibroblast growth factor receptor 2                                              | 1896,6   | 924,76   | -2,05 |
| 1441855_x_at | Cxcl1         | chemokine (C-X-C motif) ligand 1                                                 | 562,89   | 273,53   | -2,06 |
| 1427537_at   | Eppk1         | epiplakin 1                                                                      | 271,9    | 131,45   | -2,07 |
| 1448950_at   | Il1r1         | interleukin 1 receptor, type I                                                   | 326,38   | 158      | -2,07 |
| 1417823_at   | Gcat          | glycine C-acetyltransferase (2-amino-3-ketobutyrate-coenzyme A ligase)           | 807,23   | 389,94   | -2,07 |
| 1454942_at   | Fam129a       | family with sequence similarity 129, member A                                    | 560,07   | 269,76   | -2,08 |
| 1451320_at   | Arhgap8       | Rho GTPase activating protein 8                                                  | 363,54   | 174,62   | -2,08 |
| 1419209_at   | Cxcl1         | chemokine (C-X-C motif) ligand 1                                                 | 11752,01 | 5629,03  | -2,09 |
| 1428140_at   | Oxct1         | 3-oxoacid CoA transferase 1                                                      | 3581,59  | 1709,61  | -2,09 |
| 1448147_at   | Tnfrsf19      | tumor necrosis factor receptor superfamily, member 19                            | 149,2    | 70,93    | -2,1  |
| 1419052_at   | Ovol1         | OVO homolog-like 1 (Drosophila)                                                  | 137,61   | 65,22    | -2,11 |
| 1416996_at   | Tbc1d8        | TBC1 domain family, member 8                                                     | 477,57   | 226,37   | -2,11 |
| 1442291_at   | Lpar2         | lysophosphatidic acid receptor 2                                                 | 209,87   | 98,79    | -2,12 |
| 1417403_at   | Elov16        | ELOVL family member 6, elongation of long chain fatty acids (yeast)              | 523,72   | 247,31   | -2,12 |
| 1435155_at   | Cgn           | cingulin                                                                         | 304,13   | 143,58   | -2,12 |
| 1415823_at   | Scd2          | stearoyl-Coenzyme A desaturase 2                                                 | 6800,97  | 3200,18  | -2,13 |
| 1418546_a_at | Stambpl1      | STAM binding protein like 1                                                      | 765,28   | 358,63   | -2,13 |

|              |                                 |                                                                                  |          |          |       |
|--------------|---------------------------------|----------------------------------------------------------------------------------|----------|----------|-------|
| 1417971_at   | Nrm                             | nurim (nuclear envelope membrane protein)                                        | 566,76   | 265,55   | -2,13 |
| 1434194_at   | Mtap2                           | microtubule-associated protein 2                                                 | 153,93   | 71,9     | -2,14 |
| 1434684_at   | Rin3                            | Ras and Rab interactor 3                                                         | 109,95   | 50,82    | -2,16 |
| 1422403_at   | Ifna                            | predicted gene 12597 /// predicted gene 13280 /// interferon alpha 1 /// interfe | 108,65   | 50,36    | -2,16 |
| 1455320_at   | Nampt                           | nicotinamide phosphoribosyltransferase                                           | 274,29   | 126,29   | -2,17 |
| 1451854_a_at | Shroom3                         | shroom family member 3                                                           | 375,3    | 172,61   | -2,17 |
| 1429566_a_at | Hipk2                           | homeodomain interacting protein kinase 2                                         | 147      | 67,13    | -2,19 |
| 1434474_at   | Abca5                           | ATP-binding cassette, sub-family A (ABC1), member 5                              | 234,26   | 107,06   | -2,19 |
| 1417022_at   | Slc7a3                          | solute carrier family 7 (cationic amino acid transporter, y+ system), member 3   | 2079,58  | 950,16   | -2,19 |
| 1450618_a_at | Sprr2a1 /// Sprr2a2             | small proline-rich protein 2A1 /// small proline-rich protein 2A2                | 22994,87 | 10494,86 | -2,19 |
| 1458802_at   | Hivep3                          | human immunodeficiency virus type I enhancer binding protein 3                   | 170,88   | 77,7     | -2,2  |
| 1423890_x_at | Atp1b1                          | ATPase, Na+/K+ transporting, beta 1 polypeptide                                  | 818,53   | 372,56   | -2,2  |
| 1439036_a_at | Atp1b1                          | ATPase, Na+/K+ transporting, beta 1 polypeptide                                  | 1699,49  | 769,47   | -2,21 |
| 1418824_at   | Arf6                            | ADP-ribosylation factor 6                                                        | 106,92   | 48,03    | -2,23 |
| 1415904_at   | Lpl                             | lipoprotein lipase                                                               | 263,04   | 118,21   | -2,23 |
| 1424413_at   | Ogfrl1                          | opioid growth factor receptor-like 1                                             | 210,7    | 93,89    | -2,24 |
| 1416039_x_at | Cyr61                           | cysteine rich protein 61                                                         | 4400,54  | 1963,84  | -2,24 |
| 1435283_s_at | Fam189a2                        | family with sequence similarity 189, member A2                                   | 249,39   | 111,47   | -2,24 |
| 1434307_at   | Tmem64                          | transmembrane protein 64                                                         | 147,2    | 65,44    | -2,25 |
| 1450014_at   | Cldn1                           | claudin 1                                                                        | 2182,65  | 964,11   | -2,26 |
| 1416527_at   | Rab32                           | RAB32, member RAS oncogene family                                                | 2121,36  | 939,14   | -2,26 |
| 1417332_at   | Rfx2                            | regulatory factor X, 2 (influences HLA class II expression)                      | 121,76   | 53,29    | -2,28 |
| 1429298_at   | Ddah1                           | dimethylarginine dimethylaminohydrolase 1                                        | 719,03   | 314,9    | -2,28 |
| 1435330_at   | Pyh1n1                          | pyrin and HIN domain family, member 1                                            | 983,69   | 428,89   | -2,29 |
| 1455400_at   | Ddah1                           | dimethylarginine dimethylaminohydrolase 1                                        | 367,78   | 160,59   | -2,29 |
| 1429665_at   | Haus6                           | HAUS augmin-like complex, subunit 6                                              | 231,59   | 101,02   | -2,29 |
| 1435105_at   | Rnf208                          | ring finger protein 208                                                          | 383,21   | 166,42   | -2,3  |
| 1438953_at   | Figf                            | c-fos induced growth factor                                                      | 842,82   | 366,85   | -2,3  |
| 1436472_at   | Sifn9                           | schlafen 9                                                                       | 702,83   | 305,58   | -2,3  |
| 1434013_at   | Ablim3                          | actin binding LIM protein family, member 3                                       | 219,96   | 95,26    | -2,31 |
| 1450533_a_at | Plagl1                          | pleiomorphic adenoma gene-like 1                                                 | 142,65   | 61,41    | -2,32 |
| 1451775_s_at | Il13ra1                         | interleukin 13 receptor, alpha 1                                                 | 285,76   | 123,12   | -2,32 |
| 1435354_at   | Kcnj15                          | potassium inwardly-rectifying channel, subfamily J, member 15                    | 153,17   | 65,75    | -2,33 |
| 1459497_at   | ---                             | ---                                                                              | 171,35   | 73,23    | -2,34 |
| 1417343_at   | Fxyd6                           | FXYP domain-containing ion transport regulator 6                                 | 117,49   | 50,28    | -2,34 |
| 1416008_at   | Satb1                           | special AT-rich sequence binding protein 1                                       | 384,97   | 164,28   | -2,34 |
| 1427183_at   | Efemp1                          | epidermal growth factor-containing fibulin-like extracellular matrix protein 1   | 3383,2   | 1446,11  | -2,34 |
| 1449984_at   | Cxcl2                           | chemokine (C-X-C motif) ligand 2                                                 | 128,79   | 54,87    | -2,35 |
| 1440409_at   | Gcnt3                           | glucosaminyl (N-acetyl) transferase 3, mucin type                                | 312,23   | 133,02   | -2,35 |
| 1438133_a_at | Cyr61                           | cysteine rich protein 61                                                         | 2862,12  | 1215,82  | -2,35 |
| 1427165_at   | Il13ra1                         | interleukin 13 receptor, alpha 1                                                 | 564,15   | 239,24   | -2,36 |
| 1448377_at   | Slpi                            | secretory leukocyte peptidase inhibitor                                          | 1716,27  | 726,23   | -2,36 |
| 1439016_x_at | Sprr2a1 /// Sprr2a2 /// Sprr2a3 | small proline-rich protein 2A1 /// small proline-rich protein 2A2 /// small prol | 22293,61 | 9457,2   | -2,36 |
| 1424456_at   | Pvrl2                           | poliovirus receptor-related 2                                                    | 527,17   | 222,17   | -2,37 |
| 1438954_x_at | Figf                            | c-fos induced growth factor                                                      | 858,52   | 361,19   | -2,38 |
| 1440220_at   | Ocln                            | occludin                                                                         | 209,06   | 87,43    | -2,39 |
| 1416077_at   | Adm                             | adrenomedullin                                                                   | 4268,41  | 1774,58  | -2,41 |
| 1419905_s_at | Hpgd                            | hydroxyprostaglandin dehydrogenase 15 (NAD)                                      | 280,35   | 116,39   | -2,41 |
| 1435176_a_at | Id2                             | inhibitor of DNA binding 2                                                       | 4463,34  | 1842,28  | -2,42 |
| 1454995_at   | Ddah1                           | dimethylarginine dimethylaminohydrolase 1                                        | 293,94   | 121,28   | -2,42 |
| 1435282_at   | Fam189a2                        | family with sequence similarity 189, member A2                                   | 109,15   | 44,75    | -2,44 |
| 1423771_at   | Prkcdp                          | protein kinase C, delta binding protein                                          | 1670,46  | 685,73   | -2,44 |
| 1448254_at   | Ptn                             | pleiotrophin                                                                     | 182,01   | 73,95    | -2,46 |
| 1451054_at   | Orm1                            | orosomucoid 1                                                                    | 1092,04  | 442,54   | -2,47 |
| 1419728_at   | Cxcl5                           | chemokine (C-X-C motif) ligand 5                                                 | 5313,93  | 2154,25  | -2,47 |
| 1437932_a_at | Cldn1                           | claudin 1                                                                        | 6207,13  | 2502,5   | -2,48 |
| 1419532_at   | Il1r2                           | interleukin 1 receptor, type II                                                  | 283,92   | 113,16   | -2,51 |
| 1448931_at   | F2rl1                           | coagulation factor II (thrombin) receptor-like 1                                 | 665,34   | 265,38   | -2,51 |
| 1417703_at   | Pvrl2                           | poliovirus receptor-related 2                                                    | 317,33   | 126,64   | -2,51 |
| 1427284_a_at | Ttpa                            | tocopherol (alpha) transfer protein                                              | 217,55   | 86,46    | -2,52 |
| 1454783_at   | Il13ra1                         | interleukin 13 receptor, alpha 1                                                 | 735      | 290,37   | -2,53 |
| 1422470_at   | Bnip3                           | BCL2/adenovirus E1B interacting protein 3                                        | 3719,89  | 1469,58  | -2,53 |
| 1417930_at   | Nab2                            | Ngfi-A binding protein 2                                                         | 152,81   | 59,92    | -2,55 |
| 1437422_at   | Sema5a                          | sema domain, seven thrombospondin repeats (type 1 and type 1-like), transmembran | 659,89   | 259,13   | -2,55 |
| 1449528_at   | Figf                            | c-fos induced growth factor                                                      | 387,04   | 151,35   | -2,56 |
| 1425458_a_at | Grb10                           | growth factor receptor bound protein 10                                          | 909,76   | 354,26   | -2,57 |
| 1416007_at   | Satb1                           | special AT-rich sequence binding protein 1                                       | 647,25   | 248,45   | -2,61 |
| 1449325_at   | Fads2                           | fatty acid desaturase 2                                                          | 133,82   | 50,95    | -2,63 |
| 1427820_at   | ---                             | ---                                                                              | 805,34   | 305,88   | -2,63 |
| 1417404_at   | Elovl6                          | ELOVL family member 6, elongation of long chain fatty acids (yeast)              | 1297,78  | 491,79   | -2,64 |
| 1418780_at   | Cyp39a1                         | cytochrome P450, family 39, subfamily a, polypeptide 1                           | 200,91   | 74,37    | -2,7  |
| 1425476_at   | Col4a5                          | collagen, type IV, alpha 5                                                       | 308,41   | 113,64   | -2,71 |
| 1456640_at   | Sh3rf2                          | SH3 domain containing ring finger 2                                              | 104,89   | 38,39    | -2,73 |
| 1419031_at   | Fads2                           | fatty acid desaturase 2                                                          | 265,04   | 96,59    | -2,74 |
| 1421571_a_at | Ly6c1 /// Ly6c2                 | lymphocyte antigen 6 complex, locus C1 /// lymphocyte antigen 6 complex, locus C | 195,89   | 71,35    | -2,75 |
| 1436943_at   | Cyb5d2                          | cytochrome b5 domain containing 2                                                | 104,33   | 37,88    | -2,75 |
| 1448123_s_at | Tgfb1                           | transforming growth factor, beta induced                                         | 1457,52  | 526,7    | -2,77 |
| 1425177_at   | Shmt1                           | serine hydroxymethyltransferase 1 (soluble)                                      | 521,79   | 187,71   | -2,78 |
| 1453571_at   | Depdc6                          | DEP domain containing 6                                                          | 393,7    | 139,59   | -2,82 |
| 1434666_at   | Pcgf5                           | polycomb group ring finger 5                                                     | 275,27   | 95,13    | -2,89 |
| 1418030_at   | Slco3a1                         | solute carrier organic anion transporter family, member 3a1                      | 286,12   | 98,32    | -2,91 |
| 1453041_at   | Ano9                            | anoctamin 9                                                                      | 124,85   | 42,4     | -2,94 |
| 1422537_a_at | Id2                             | inhibitor of DNA binding 2                                                       | 536,98   | 178,15   | -3,01 |
| 1424901_at   | Gcnt3                           | glucosaminyl (N-acetyl) transferase 3, mucin type                                | 120,78   | 40,06    | -3,02 |
| 1419089_at   | Timp3                           | tissue inhibitor of metalloproteinase 3                                          | 152,39   | 50,38    | -3,02 |
| 1437258_at   | Sprr2a1 /// Sprr2a2             | small proline-rich protein 2A1 /// small proline-rich protein 2A2                | 504,04   | 165,86   | -3,04 |
| 1420503_at   | Slc6a14                         | solute carrier family 6 (neurotransmitter transporter), member 14                | 119,7    | 39,19    | -3,05 |

|              |           |                                                                                  |         |         |        |
|--------------|-----------|----------------------------------------------------------------------------------|---------|---------|--------|
| 1418133_at   | Bcl3      | B-cell leukemia/lymphoma 3                                                       | 276,22  | 90,39   | -3,06  |
| 1415871_at   | Tgfb1     | transforming growth factor, beta induced                                         | 413,17  | 134,86  | -3,06  |
| 1418294_at   | Epb4.114b | erythrocyte protein band 4.1-like 4b                                             | 504,25  | 164,29  | -3,07  |
| 1429564_at   | Pcgf5     | polycomb group ring finger 5                                                     | 2086,25 | 676,8   | -3,08  |
| 1431214_at   | Gm3579    | predicted gene 3579                                                              | 5242,09 | 1695,04 | -3,09  |
| 1455056_at   | Lmo7      | LIM domain only 7                                                                | 620,4   | 197,23  | -3,15  |
| 1431213_a_at | Gm3579    | predicted gene 3579                                                              | 8058,01 | 2557,14 | -3,15  |
| 1426914_at   | Marveld2  | MARVEL (membrane-associating) domain containing 2                                | 681,33  | 215,32  | -3,16  |
| 1419247_at   | Rgs2      | regulator of G-protein signaling 2                                               | 545,78  | 170,39  | -3,2   |
| 1419717_at   | Sema3e    | sema domain, immunoglobulin domain (Ig), short basic domain, secreted, (semaphor | 228,48  | 71,07   | -3,21  |
| 1416968_a_at | Hsd3b7    | hydroxy-delta-5-steroid dehydrogenase, 3 beta- and steroid delta-isomerase 7     | 113,05  | 35,2    | -3,21  |
| 1419248_at   | Rgs2      | regulator of G-protein signaling 2                                               | 710,48  | 221,05  | -3,21  |
| 1449335_at   | Timp3     | tissue inhibitor of metalloproteinase 3                                          | 251,09  | 76,56   | -3,28  |
| 1447830_s_at | Rgs2      | regulator of G-protein signaling 2                                               | 278,06  | 83,2    | -3,34  |
| 1450098_at   | Dhdpsl    | dihydrodipicolinate synthase-like, mitochondrial                                 | 157,79  | 47,09   | -3,35  |
| 1434776_at   | Sema5a    | sema domain, seven thrombospondin repeats (type 1 and type 1-like), transmembran | 352,64  | 103,33  | -3,41  |
| 1420504_at   | Slc6a14   | solute carrier family 6 (neurotransmitter transporter), member 14                | 150,27  | 43,51   | -3,45  |
| 1427072_at   | Stard8    | START domain containing 8                                                        | 252,56  | 73,3    | -3,45  |
| 1418752_at   | Aldh3a1   | aldehyde dehydrogenase family 3, subfamily A1                                    | 201,95  | 58,14   | -3,47  |
| 1417346_at   | Pycard    | PYD and CARD domain containing                                                   | 335,49  | 93,01   | -3,61  |
| 1449071_at   | Myl7      | myosin, light polypeptide 7, regulatory                                          | 277,42  | 75,66   | -3,67  |
| 1460629_at   | Trim16    | tripartite motif-containing 16                                                   | 366,98  | 100,08  | -3,67  |
| 1448873_at   | Ocln      | occludin                                                                         | 877,12  | 237,78  | -3,69  |
| 1429863_at   | Lonrf3    | LON peptidase N-terminal domain and ring finger 3                                | 125,09  | 32,13   | -3,89  |
| 1455435_s_at | Chdh      | choline dehydrogenase                                                            | 235,97  | 60,4    | -3,91  |
| 1433795_at   | Tgfb3     | transforming growth factor, beta receptor III                                    | 986,62  | 251,08  | -3,93  |
| 1456796_at   | Snai3     | snail homolog 3 (Drosophila)                                                     | 148,51  | 37,25   | -3,99  |
| 1420401_a_at | Ramp3     | receptor (calcitonin) activity modifying protein 3                               | 352,84  | 86,47   | -4,08  |
| 1423062_at   | Igfbp3    | insulin-like growth factor binding protein 3                                     | 6969,3  | 1706,58 | -4,08  |
| 1458268_s_at | Igfbp3    | insulin-like growth factor binding protein 3                                     | 1931,24 | 454,75  | -4,25  |
| 1455144_s_at | AU040829  | expressed sequence AU040829                                                      | 246,56  | 53,57   | -4,6   |
| 1417597_at   | Cd28      | CD28 antigen                                                                     | 124,73  | 23,03   | -5,42  |
| 1416318_at   | Serpinb1a | serine (or cysteine) peptidase inhibitor, clade B, member 1a                     | 214,53  | 39,35   | -5,45  |
| 1417355_at   | Peg3      | paternally expressed 3                                                           | 154,26  | 28,03   | -5,5   |
| 1427683_at   | Egr2      | early growth response 2                                                          | 102,37  | 17,97   | -5,7   |
| 1417356_at   | Peg3      | paternally expressed 3                                                           | 119,74  | 17,3    | -6,92  |
| 1451924_a_at | Edn1      | endothelin 1                                                                     | 342,23  | 46,93   | -7,29  |
| 1433924_at   | Peg3      | paternally expressed 3                                                           | 470,13  | 46,69   | -10,07 |
| 1437052_s_at | Slc2a3    | solute carrier family 2 (facilitated glucose transporter), member 3              | 106,35  | 7,37    | -14,44 |
